# Supplementary material for: Children Exposure-Related Behavior Patterns and Risk Perception Associated with Recreational Beach Use
Source: Int J Environ Res Public Health. 2019 Aug 3;16(15):2783. doi: 10.3390/ijerph16152783 (PMC6696461; doi:10.3390/ijerph16152783)
Supplement: Supplementary file 1 [file ijerph-16-02783-s001.pdf]

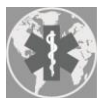

# Children Exposure-Related Behavior Patterns and Risk Perception Associated with Recreational Beach Use

## Supplementary Material

**Table S1.** Demographics of Respondents.

|                                              |                                                                                                                                                    |                   |                  |                  |                   |                   |               |
|----------------------------------------------|----------------------------------------------------------------------------------------------------------------------------------------------------|-------------------|------------------|------------------|-------------------|-------------------|---------------|
| Age                                          | Mean:<br>37.95                                                                                                                                     | Min:<br>17        | Max:<br>73       |                  |                   |                   | NR*:<br>3.3 % |
| Sex                                          | Female:<br>71.8%                                                                                                                                   | Male:<br>28.2%    |                  |                  |                   |                   | NR:<br>16.8%  |
| Hispanic Descent                             | No: 54.4%                                                                                                                                          | Yes: 46.6%        |                  |                  |                   |                   | NR:<br>2.5 %  |
| Race                                         | White:<br>75.5%                                                                                                                                    | Black:<br>18.4%   | Other:<br>6.1%   |                  |                   |                   | NR:<br>10.3%  |
| Household Income                             | <\$12,000<br>8.6%                                                                                                                                  | <\$20,000<br>5.0% | <30,000<br>11.8% | <50,000<br>16.2% | <100,000<br>25.4% | >100,000<br>19.9% | NR:<br>13.1%  |
| Primary Occupation                           | e.g., student, housewife, nurse, electrician, cook, law enforcement, physical therapist, nanny, CAD designer, engineer, plumber, realtor           |                   |                  |                  |                   |                   | NR:<br>6.8%   |
| Hours worked in Primary Occupation           | Mean:<br>38.30                                                                                                                                     | SE:<br>0.78       | Min:<br>3        | Max:<br>74       |                   |                   | NR:<br>46.8%  |
| Primary Occupation of Spouse                 | e.g., seamstress, pilot, certified public accountant, barber, engineer, stock broker, mechanic, personal trainer, apartment manager, social worker |                   |                  |                  |                   |                   | NR:<br>39.8%  |
| Hours worked in Primary Occupation of Spouse | Mean:<br>42.79                                                                                                                                     | SE: 0.81          | Min:<br>12       | Max:<br>84       |                   |                   | NR:<br>60.8   |

\*NR: No Response Rate .

**Table S2.** Beach Dynamics and Profile of Children.

|                                                                          |                  |                    |               |             |                        |
|--------------------------------------------------------------------------|------------------|--------------------|---------------|-------------|------------------------|
| No of children (<18) that go to the beach who live in home of respondent | Mean: 1.85       | SE: 0.056          | Min: 0        | Max: 8      | NR <sup>a</sup> %. 7.3 |
| No of children respondent typically takes to the beach                   | Mean: 2.16       | SE: 2.16           | Min: 0        | Max: 14     | NR%: 8.3               |
| Relation of children to adult respondent                                 | Parent: 79.8%    | Grandparent: 10.5% | Guardian: 2.0 | Other: 7.8% | NR%: 0                 |
| Distance staying/living from beach in miles                              | < 5: 26.8%       | <10: 13.2%         | <20: 17.1%    | <30: 12.2%  | >30: 30.6              |
|                                                                          |                  |                    |               |             | NR%: 3.8               |
| Method to get to beach                                                   | Drive/car: 91.3% | Walk: 9.9%         | Bus: 0.5%     | Other: 1.0% | NR%: 2                 |

<sup>a</sup>NR: Non Response Rate.

**Table S3.** Risk Perceptions.

| Questions                                       | %Yes | %No  | %Maybe | %Uncertain | NR <sup>a</sup> % |
|-------------------------------------------------|------|------|--------|------------|-------------------|
| Have gotten sick after visiting beach?          | 8.5  | 80.5 | 4.0    | 7.0        | 0.3               |
| Possible to get sick after visiting beach?      | 47.2 | 15.8 | 22.6   | 14.3       | 0.5               |
| Do you see signs and posting on the beach area? | 82.2 | 10.5 | 4.8    | 2.5        | 0.3               |
| Do you pay attention to signs and postings?     | 88.9 | 3.3  | 6.6    | 1.3        | 1.3               |

<sup>a</sup>NR: No response.
